# Supplementary material for: Impacts of short-term air pollution exposure on appendicitis admissions: Evidence from one of the most polluted cities in mainland China
Source: PubMed Central journal article supplement (PMC10061118; doi:10.3389/fpubh.2023.1144310), 2023-03-16
Supplement: Data_Sheet_1.pdf [file Data_Sheet_1.pdf]

## *Supplementary Material*

### Impacts of short-term air pollution exposure on appendicitis admissions: Evidence from one of the most polluted cities in mainland China

Yanhu Ji<sup>1,2</sup>, Xuefeng Su<sup>3</sup>, Fengying Zhang<sup>4</sup>, Zepeng Huang<sup>5</sup>, Xiaowei Zhang<sup>1,2</sup>, Yueliang Chen<sup>1,2</sup>, Ziyi Song<sup>1,2</sup>, Liping Li<sup>1,2,\*</sup>

<sup>1</sup> School of Public Health, Shantou University, 515063, Shantou, China

<sup>2</sup> Injury Prevention Research Center, Shantou University Medical College, 515041, Shantou, China

<sup>3</sup> Linfen People's Hospital, 041000, Linfen, China

<sup>4</sup> China National Environmental Monitoring Center, 100012, Beijing, China

<sup>5</sup> The Second Affiliated Hospital of Shantou University Medical College, 515041, Shantou, China

\* **Correspondence:** Liping Li: [lppli@stu.edu.cn](mailto:lppli@stu.edu.cn)

**Fig. S1** Time series of air pollutants in Linfen, China, from 2016-2018

**Table S1** The effects of appendicitis admissions per 10  $\mu\text{g}/\text{m}^3$  increase in pollutant concentrations by sex and age

**Table S2** The effects of appendicitis admissions per 10  $\mu\text{g}/\text{m}^3$  increase in pollutant concentrations by season

**Table S3** The results of varying the degrees of freedom (6-9 *df*) for time

**Table S4** The results of varying the degrees of freedom (3-5 *df*) for mean temperature and relative humidity

**Fig. S1** Time series of air pollutants in Linfen, China, from 2016-2018

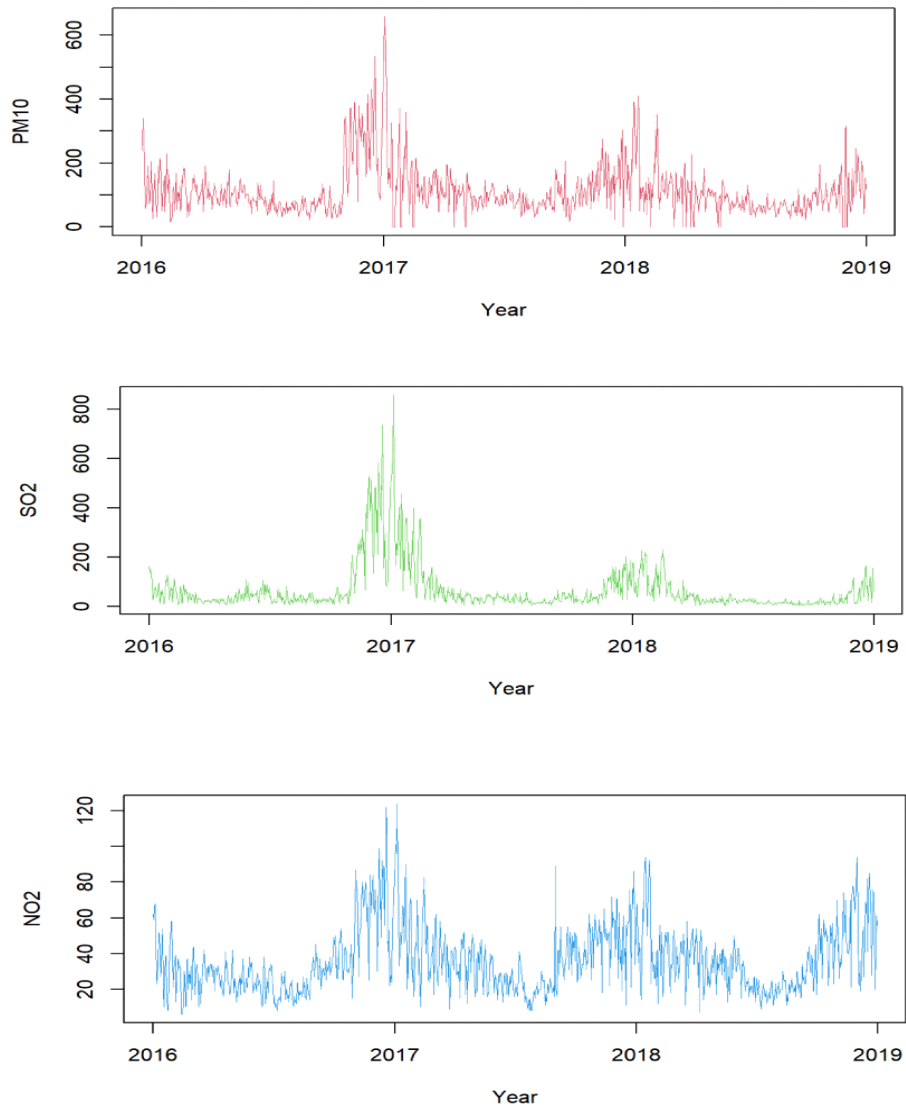

**Table S1** The effects of appendicitis admissions per 10  $\mu\text{g}/\text{m}^3$  increase in pollutant concentrations by sex and age

| Pollutants       | Lag day | Gender                 |                       | Age                   |                        |                       |
|------------------|---------|------------------------|-----------------------|-----------------------|------------------------|-----------------------|
|                  |         | Male                   | Female                | $\leq 20$ years       | 21-39 years            | $\geq 40$ years       |
| PM <sub>10</sub> | 0       | 1.0197(1.0140-1.0254)* | 1.0127(0.9934-1.0322) | 1.0029(0.9786-1.0278) | 1.0230(1.0169-1.0292)* | 0.9920(0.9677-1.0168) |
|                  | 1       | 1.0105(1.0048-1.0163)* | 1.0016(0.9823-1.0213) | 0.9775(0.9532-1.0024) | 1.0135(1.0073-1.0197)* | 0.9964(0.9719-1.0215) |
|                  | 2       | 1.0032(0.9976-1.0089)  | 0.9942(0.9756-1.0132) | 0.9771(0.9533-1.0015) | 1.0035(0.9974-1.0097)  | 1.0076(0.9837-1.0321) |
|                  | 3       | 0.9998(0.9942-1.0054)  | 0.9909(0.9728-1.0095) | 0.9919(0.9687-1.0155) | 0.9994(0.9934-1.0054)  | 0.9943(0.9707-1.0184) |
|                  | 4       | 1.0044(0.9989-1.0100)  | 0.9725(0.9537-1.0001) | 0.9882(0.9644-1.0126) | 1.0022(0.9963-1.0082)  | 0.9888(0.9648-1.0133) |
|                  | 5       | 1.0024(0.9969-1.0079)  | 0.9887(0.9703-1.0075) | 0.9988(0.9751-1.0231) | 1.0004(0.9944-1.0063)  | 1.0017(0.9781-1.0258) |
|                  | 01      | 1.0189(1.0125-1.0254)* | 1.0092(0.9875-1.0315) | 0.9874(0.9597-1.0159) | 1.0229(1.0160-1.0298)* | 0.9928(0.9656-1.0207) |
|                  | 02      | 1.0172(1.0102-1.0243)* | 1.0044(0.9805-1.0288) | 0.9753(0.9443-1.0074) | 1.0206(1.0129-1.0282)* | 0.9983(0.9684-1.0292) |
|                  | 03      | 1.0156(1.0078-1.0235)* | 0.9994(0.9735-1.0260) | 0.9735(0.9396-1.0087) | 1.0184(1.0100-1.0269)* | 0.9961(0.9632-1.0299) |
|                  | 04      | 1.0172(1.0087-1.0258)* | 0.9856(0.9571-1.0147) | 0.9670(0.9297-1.0059) | 1.0188(1.0096-1.0281)* | 0.9910(0.9549-1.0284) |

## Supplementary Material

|                 |    |                        |                        |                       |                        |                       |
|-----------------|----|------------------------|------------------------|-----------------------|------------------------|-----------------------|
|                 | 05 | 1.0179(1.0086-1.0272)* | 0.9812(0.9509-1.0125)  | 0.9681(0.9284-1.0096) | 1.0185(1.0085-1.0285)* | 0.9912(0.9521-1.0320) |
|                 | 0  | 1.0235(1.0179-1.0291)* | 1.0186(0.9992-1.0385)  | 1.0172(0.9910-1.0440) | 1.0241(1.0181-1.0301)* | 1.0153(0.9907-1.0404) |
|                 | 1  | 1.0141(1.0081-1.0202)* | 1.0057(0.9845-1.0272)  | 0.9864(0.9584-1.0153) | 1.0154(1.0089-1.0219)* | 1.0089(0.9828-1.0357) |
|                 | 2  | 1.0065(1.0005-1.0126)* | 1.0089(0.9888-1.0300)  | 0.9967(0.9689-1.0253) | 1.0059(0.9994-1.0124)  | 1.0213(0.9946-1.0487) |
|                 | 3  | 1.0045(0.9986-1.0104)  | 0.9826(0.9620-1.0037)  | 1.0001(0.9731-1.0278) | 1.0029(0.9966-1.0092)  | 0.9882(0.9617-1.0155) |
|                 | 4  | 1.0030(0.9972-1.0087)  | 0.9837(0.9622-1.0053)  | 1.0100(0.9833-1.0375) | 0.9980(0.9918-1.0042)  | 0.9900(0.9639-1.0168) |
| SO <sub>2</sub> | 5  | 0.9998(0.9940-1.0055)  | 0.9808(0.9601-1.0020)  | 0.9998(0.9727-1.0275) | 0.9969(0.9907-1.0031)  | 0.9987(0.9734-1.0247) |
|                 | 01 | 1.0244(1.0177-1.0311)* | 1.0163(0.9932-1.0400)  | 1.0037(0.9733-1.0350) | 1.0257(1.0184-1.0329)* | 1.0159(0.9871-1.0456) |
|                 | 02 | 1.0241(1.0165-1.0317)* | 1.0184(0.9922-1.0453)  | 1.0007(0.9668-1.0357) | 1.0249(1.0167-1.0332)* | 1.0243(0.9913-1.0585) |
|                 | 03 | 1.0245(1.0160-1.0330)* | 1.0084(0.9801-1.0376)  | 1.0008(0.9639-1.0391) | 1.0244(1.0152-1.0336)* | 1.0173(0.9812-1.0548) |
|                 | 04 | 1.0248(1.0155-1.0341)* | 0.9925(0.9626-1.0233)  | 1.0053(0.9648-1.0475) | 1.0220(1.0121-1.0321)* | 1.0120(0.9731-1.0525) |
|                 | 05 | 1.0243(1.0142-1.0345)* | 0.9848(0.9529-1.0177)  | 1.0051(0.9613-1.0509) | 1.0201(1.0093-1.0311)* | 1.0110(0.9688-1.0549) |
|                 | 0  | 1.0641(1.0459-1.0827)* | 1.0675(1.0149-1.1228)* | 1.0328(0.9633-1.1073) | 1.0720(1.0525-1.0919)* | 1.0405(0.9598-1.1279) |
| NO <sub>2</sub> | 1  | 1.0463(1.0250-1.0680)* | 0.9977(0.9233-1.0781)  | 0.9200(0.8144-1.0394) | 1.0508(1.0281-1.0740)* | 1.0281(0.9401-1.1243) |

---

|    |                        |                       |                       |                        |                       |
|----|------------------------|-----------------------|-----------------------|------------------------|-----------------------|
| 2  | 1.0216(0.9981-1.0456)  | 0.9579(0.8770-1.0464) | 0.9339(0.8333-1.0467) | 1.0173(0.9911-1.0441)  | 1.0358(0.9551-1.1234) |
| 3  | 1.0023(0.9772-1.0280)  | 0.9296(0.8503-1.0163) | 0.9358(0.8377-1.0454) | 1.0005(0.9734-1.0284)  | 0.9559(0.8493-1.0760) |
| 4  | 0.9985(0.9740-1.0234)  | 0.9997(0.8410-1.0102) | 0.9331(0.8338-1.0441) | 0.9891(0.9622-1.0167)  | 0.9257(0.8231-1.0411) |
| 5  | 0.9983(0.9743-1.0229)  | 0.9185(0.8278-1.0093) | 0.9462(0.8494-1.0539) | 0.9812(0.9544-1.0087)  | 1.0482(0.9717-1.1307) |
| 01 | 1.0960(1.0678-1.1248)* | 1.0655(0.9816-1.1566) | 0.9881(0.8790-1.1107) | 1.1079(1.0774-1.1393)* | 1.0586(0.9450-1.1858) |
| 02 | 1.1085(1.0728-1.1453)* | 1.0399(0.9347-1.1569) | 0.9457(0.8185-1.0927) | 1.1178(1.0786-1.1583)* | 1.0852(0.9483-1.2419) |
| 03 | 1.1097(1.0674-1.1537)* | 0.9984(0.8802-1.1325) | 0.9118(0.7743-1.0738) | 1.1175(1.0712-1.1659)* | 1.0649(0.9039-1.2547) |
| 04 | 1.1087(1.0608-1.1587)* | 0.9226(0.7988-1.0654) | 0.8760(0.7294-1.0521) | 1.1096(1.0575-1.1644)* | 1.0195(0.8452-1.2298) |
| 05 | 1.1068(1.0543-1.1618)* | 0.8735(0.7463-1.0225) | 0.8495(0.6966-1.0360) | 1.0953(1.0387-1.1549)* | 1.0615(0.8665-1.3003) |

---

**Note.** \* $P < 0.05$ .

**Table S2** The effects of appendicitis admissions per 10  $\mu\text{g}/\text{m}^3$  increase in pollutant concentrations by season

| Pollutants       | Lag day | Season                 |                        |
|------------------|---------|------------------------|------------------------|
|                  |         | Warm                   | Cold                   |
| PM <sub>10</sub> | 0       | 1.0355(1.0104-1.0612)* | 1.0215(1.0168-1.0262)* |
|                  | 1       | 1.0038(0.9803-1.0279)  | 1.0094(1.0045-1.0144)* |
|                  | 2       | 0.9827(0.9600-1.0060)  | 1.0019(0.9972-1.0066)  |
|                  | 3       | 0.9865(0.9634-1.0101)  | 0.9976(0.9930-1.0022)  |
|                  | 4       | 0.9941(0.9707-1.0181)  | 0.9981(0.9936-1.0026)  |
|                  | 5       | 1.0129(0.9894-1.0369)  | 0.9983(0.9939-1.0028)  |
|                  | 01      | 1.0281(0.9986-1.0585)  | 1.0192(1.0139-1.0245)* |
|                  | 02      | 1.0127(0.9791-1.0473)  | 1.0165(1.0106-1.0224)* |
|                  | 03      | 1.0034(0.9656-1.0426)  | 1.0136(1.0071-1.0202)* |
|                  | 04      | 0.9995(0.9575-1.0434)  | 1.0119(1.0048-1.0191)* |
|                  | 05      | 1.0082(0.9616-1.0570)  | 1.0106(1.0029-1.0184)* |

|                 |    |                        |                        |
|-----------------|----|------------------------|------------------------|
|                 | 0  | 1.1950(1.1465-1.2456)* | 1.0200(1.0160-1.0240)* |
|                 | 1  | 1.0693(1.0232-1.1174)* | 1.0122(1.0077-1.0167)* |
|                 | 2  | 1.0165(0.9729-1.0620)  | 1.0063(1.0018-1.0109)* |
|                 | 3  | 1.0044(0.9617-1.0491)  | 1.0009(0.9965-1.0053)  |
|                 | 4  | 0.9767(0.9348-1.0204)  | 0.9984(0.9941-1.0027)  |
| SO <sub>2</sub> | 5  | 1.0049(0.9621-1.0495)  | 0.9973(0.9930-1.0016)  |
|                 | 01 | 1.2298(1.1631-1.3003)* | 1.0210(1.0162-1.0259)* |
|                 | 02 | 1.2209(1.1429-1.3043)* | 1.0214(1.0158-1.0270)* |
|                 | 03 | 1.2019(1.1179-1.2921)* | 1.0205(1.0142-1.0268)* |
|                 | 04 | 1.1701(1.0816-1.2660)* | 1.0187(1.0117-1.0257)* |
|                 | 05 | 1.1698(1.0743-1.2737)* | 1.0170(1.0094-1.0247)* |
|                 | 0  | 1.0879(1.0044-1.1784)* | 1.1458(1.1214-1.1707)* |
| NO <sub>2</sub> | 1  | 1.1028(1.0179-1.1947)* | 1.0693(1.0429-1.0964)* |
|                 | 2  | 1.0207(0.9425-1.1054)  | 1.0186(0.9952-1.0426)  |

---

|    |                        |                        |
|----|------------------------|------------------------|
| 3  | 0.9934(0.9186-1.0742)  | 0.9845(0.9629-1.0066)  |
| 4  | 0.9298(0.8598-1.0054)  | 0.9799(0.9591-1.0012)  |
| 5  | 0.9596(0.8875-1.0375)  | 0.9848(0.9640-1.0061)  |
| 01 | 1.1460(1.0377-1.2655)* | 1.1518(1.1214-1.1831)* |
| 02 | 1.1482(1.0232-1.2885)* | 1.1464(1.1108-1.1830)* |
| 03 | 1.1351(0.9976-1.2916)  | 1.1257(1.0857-1.1672)* |
| 04 | 1.0780(0.9349-1.2431)  | 1.1050(1.0614-1.1504)* |
| 05 | 1.0492(0.8971-1.2272)  | 1.0910(1.0442-1.1400)* |

---

**Note.** \* $P < 0.05$ .



**Table S3** The results of varying the degrees of freedom (6-9 *dfs*) for time

| Pollutants       | Time( <i>df</i> =6)    | Time( <i>df</i> =7)    | Time( <i>df</i> =8)    | Time( <i>df</i> =9)    |
|------------------|------------------------|------------------------|------------------------|------------------------|
| PM <sub>10</sub> | 1.0194(1.0142-1.0245)* | 1.0179(1.0129-1.0230)* | 1.0177(1.0125-1.0229)* | 1.0172(1.0121-1.0224)* |
| SO <sub>2</sub>  | 1.0253(1.0200-1.0307)* | 1.0236(1.0184-1.0288)* | 1.0234(1.0181-1.0288)* | 1.0229(1.0176-1.0283)* |
| NO <sub>2</sub>  | 1.1019(1.0793-1.1249)* | 1.0979(1.0704-1.1262)* | 1.0932(1.0704-1.1165)* | 1.0955(1.0725-1.1189)* |

**Note.** The maximum effect values with multi-day lag (lag01 for PM<sub>10</sub>, SO<sub>2</sub> and NO<sub>2</sub> ) were used for appendicitis hospitalization.\**P* < 0.05

**Table S4** The results of varying the degrees of freedom (3-5 *dfs*) for mean temperature and relative humidity

| Pollutants       | MT               |                  |                  | RH               |                  |                  |
|------------------|------------------|------------------|------------------|------------------|------------------|------------------|
|                  | <i>df</i> =3     | <i>df</i> =4     | <i>df</i> =5     | <i>df</i> =3     | <i>df</i> =4     | <i>df</i> =5     |
| PM <sub>10</sub> | 1.0179           | 1.0178           | 1.0179           | 1.0179           | 1.0179           | 1.0179           |
|                  | (1.0129-1.0230)* | (1.0128-1.0228)* | (1.0128-1.0229)* | (1.0129-1.0230)* | (1.0129-1.0230)* | (1.0129-1.0229)* |
| SO <sub>2</sub>  | 1.0236           | 1.0234           | 1.0234           | 1.0236           | 1.0237           | 1.0232           |
|                  | (1.0184-1.0288)* | (1.0182-1.0287)* | (1.0182-1.0286)* | (1.0184-1.0288)* | (1.0185-1.0289)* | (1.0181-1.0285)* |
| NO <sub>2</sub>  | 1.0979           | 1.0913           | 1.0892           | 1.0979           | 1.0920           | 1.0925           |
|                  | (1.0704-1.1262)* | (1.0696-1.1133)* | (1.0677-1.1112)* | (1.0704-1.1262)* | (1.0703-1.1142)* | (1.0707-1.1147)* |

**Note.** The maximum effect values with multi-day lag (lag01 for PM<sub>10</sub>, SO<sub>2</sub> and NO<sub>2</sub> ) were used for appendicitis hospitalization. \* $P < 0.05$
